# Supplementary material
Source: PubMed Central journal article supplement (PMC1334682)

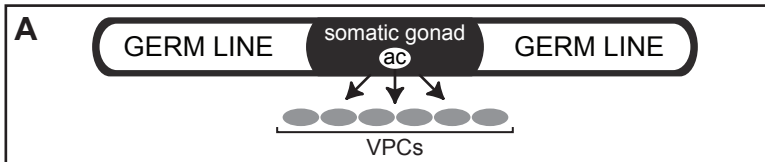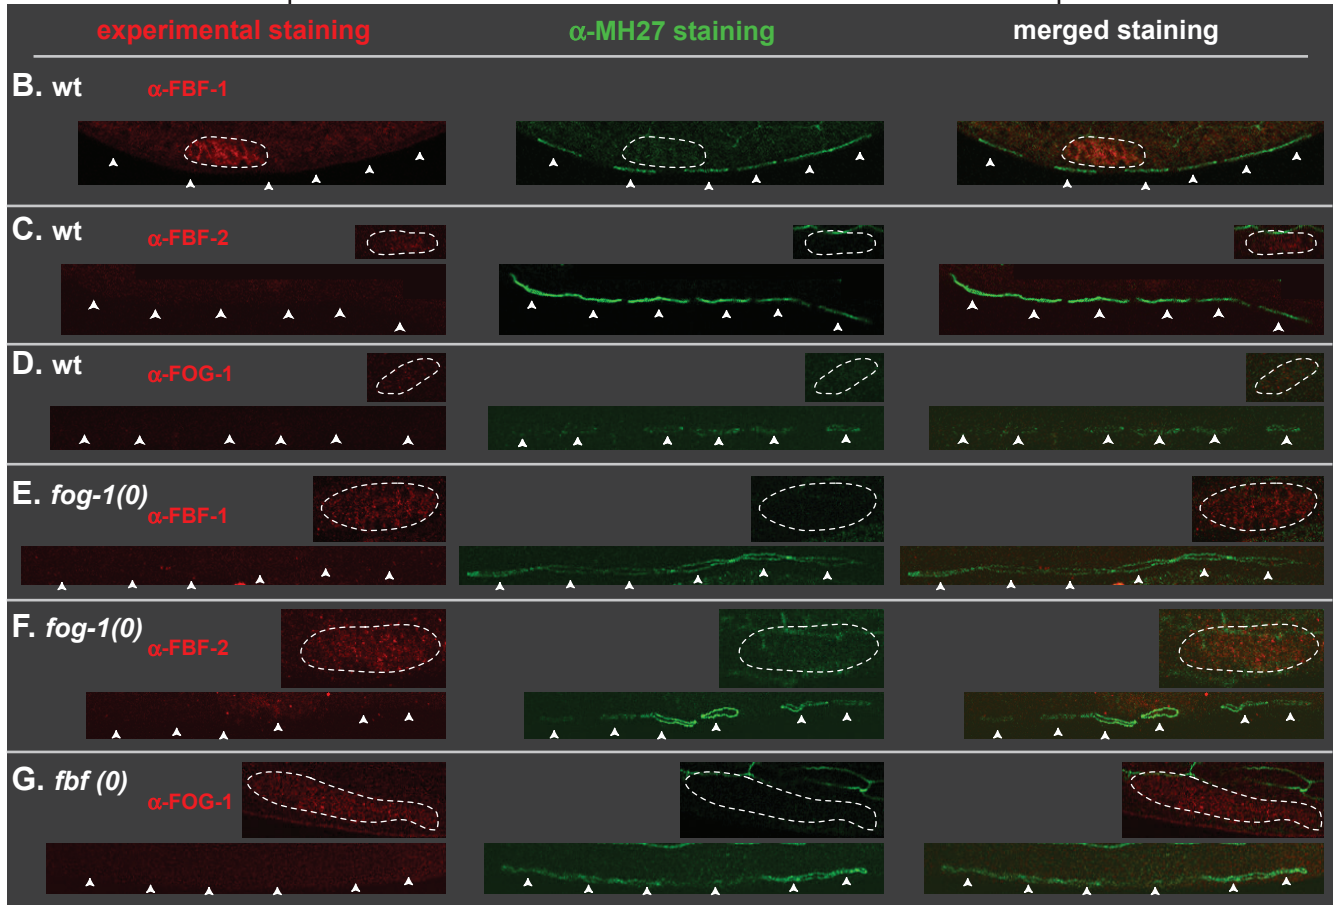

Supplement: pnas_0510264103_1.pdf [file pnas_0510264103_1.pdf]
